# Supplementary material for: A novel green chemistry gelation method for polyvinyl pyrrolidone (PVP) and dimethylpolysiloxane (silicone): microwave-induced in-liquid-plasma
Source: Royal Society of Chemistry journal article supplement (doi:10.1039/d1ra03007h), 2021-01-01
Supplement: d1ra03007h1.pdf [file d1ra03007h1.pdf]

## A Novel Green Chemistry Gelation Method for Polyvinyl Pyrrolidone (PVP) and Dimethylpolysiloxane (Silicone): Microwave-induced in-liquid-plasma

Satoshi Horikoshi,<sup>a\*</sup> Seiya Sawada,<sup>a</sup> and Nick Serpone<sup>b</sup>

<sup>a</sup> Department of Materials and Life Sciences, Faculty of Science and Technology, Sophia University, 7-1 Kioicho, Chiyodaku, Tokyo 102-8554, Japan

<sup>b</sup> PhotoGreen Laboratory, Dipartimento di Chimica, Università di Pavia, Via Taramelli 12, Pavia 27100, Italia.

### Supplementally Table and Figures

**Table S1** Toxicity for LD<sub>50</sub> (lethal dose 50) of initiators, crosslinkers and organic solvents [ref. 1]

|             | Major chemicals                | LD <sub>50</sub> (rat) / mg kg <sup>-1</sup> |
|-------------|--------------------------------|----------------------------------------------|
| Crosslinker | N-methylenebisacrylamide       | 1390                                         |
|             | Ethylene glycol dimethacrylate | 3300                                         |
| Initiator   | Azobisisobutyronitrile         | 100                                          |
|             | Benzoyl peroxide               | 7710                                         |

**Ref. 1:** M. Hirata, Latest water-soluble polymers, J. Jpn. Soc. Colour Mater., 1976, 49, 355-363.

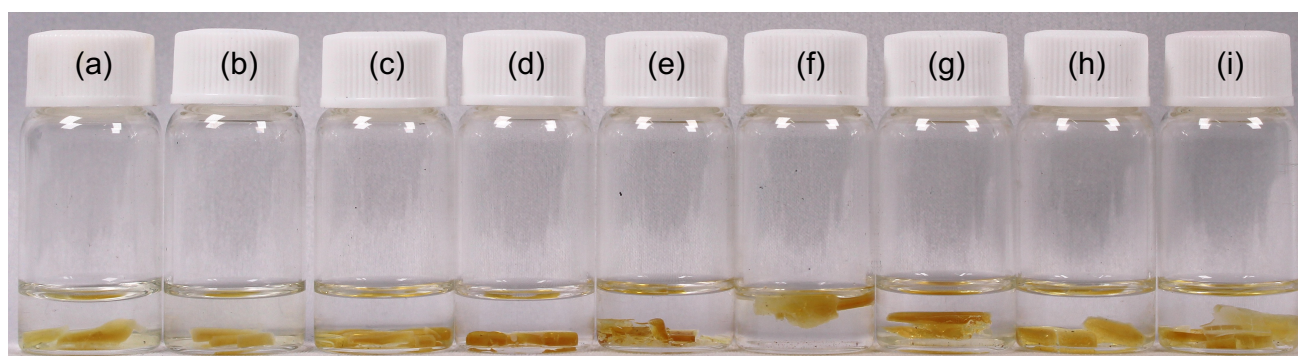

**Figure S1.** Photograph of in 9 kinds of solvents for a PVP gel generated by 5 min of microwave-induced plasma-in-liquid (MPL). Addition to ((a) water, (b) methanol, (c) ethanol, (d) acetone, (e) hexane, (f) chloroform, (g) dimethylformamide, (h) dimethylacetamide, and (i) tetrahydrofuran).

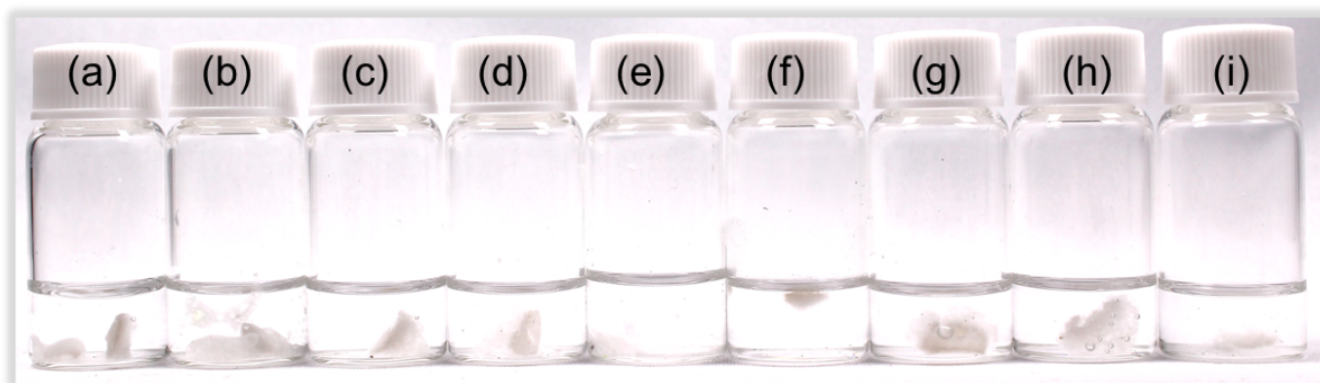

**Figure S2.** Photograph of in 9 kinds of solvents for a Silicone gel generated by 5 min of microwave-induced plasma-in-liquid (MPL). Addition to ((a) water, (b) methanol, (c) ethanol, (d) acetone, (e) hexane, (f) chloroform, (g) dimethylformamide, (h) dimethylacetamide, and (i) tetrahydrofuran).
